# Supplementary material for: Peganum harmala enhanced GLP-1 and restored insulin signaling to alleviate AlCl3-induced Alzheimer-like pathology model
Source: PubMed Central journal article supplement (PMC8187628; doi:10.1038/s41598-021-90545-4), 2021-06-08

***Peganum Harmala* enhanced GLP-1 and restored insulin signaling to alleviate AlCl<sub>3</sub>-induced Alzheimer-Like pathology model**

**Authors**

Rofida A Saleh <sup>1</sup>, Tarek F. Eissa <sup>2</sup>, Dalaal M. Abdallah <sup>1, \*</sup>, Muhammed A. Saad <sup>1,3</sup>, Hanan S. El-Abhar <sup>1,4</sup>

**Affiliation**

<sup>1</sup> Department of Pharmacology and Toxicology, Faculty of Pharmacy, Cairo University, Cairo, Egypt

<sup>2</sup> Faculty of Biotechnology, October University for Modern Sciences and Arts (MSA), Giza, Egypt

<sup>3</sup> Department of Pharmacology and Toxicology, School of Pharmacy, Newgiza University, Cairo, Egypt

<sup>4</sup> Department of Pharmacology, Toxicology & Biochemistry, Faculty of Pharmaceutical Sciences and Pharmaceutical Industries, Future University in Egypt, Cairo, Egypt.

**\* Corresponding author: [dalaal.abdallah@pharma.cu.edu.eg](mailto:dalaal.abdallah@pharma.cu.edu.eg)**

**Supplementary figure (S1)**

**(A) pS307-IRS-1**

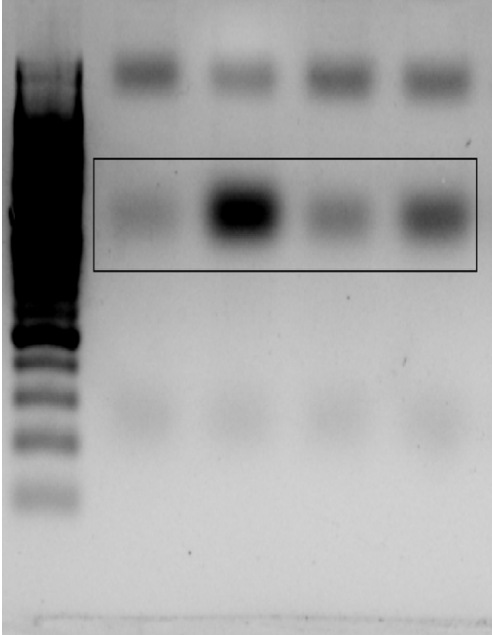

**(B) pS473-Akt**

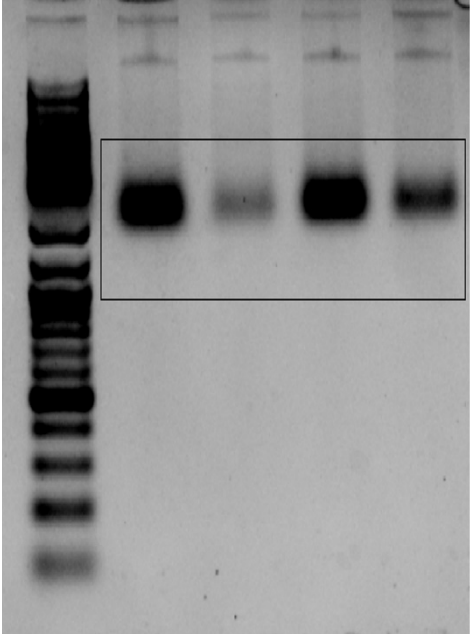

**(C)  $\beta$ -actin**

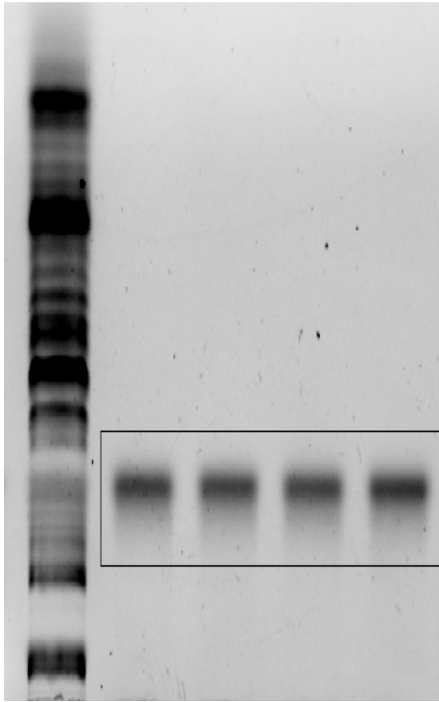

**(D) *p*-tau**

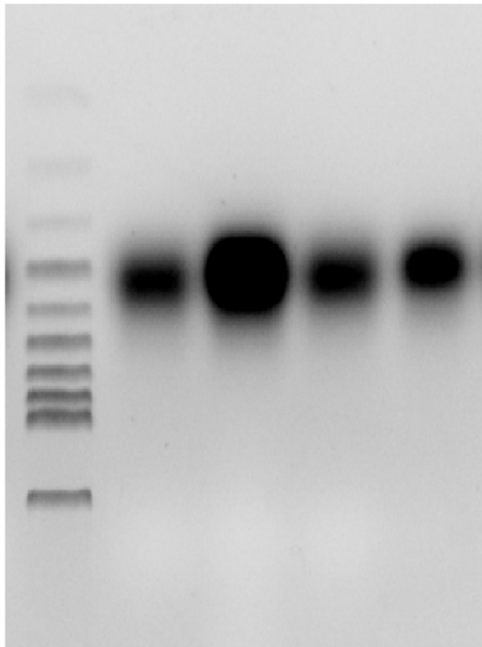

(E)  $\beta$ -actin

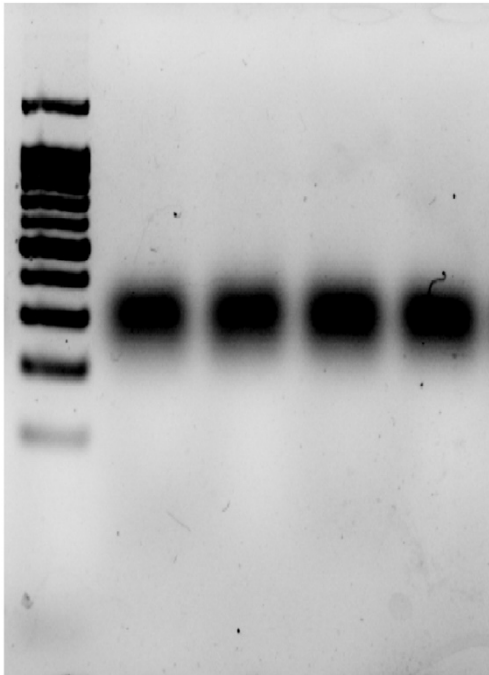

Supplement: 41598_2021_90545_MOESM1_ESM.pdf [file 41598_2021_90545_MOESM1_ESM.pdf]
